# Supplementary material
Source: Springer Nature journal article supplement (https://www.springermedizin.de/resource/supplementary/12889_2011_3422_MOESM2_ESM.pdf/9489010)
Supplement: MOESM2 [file 9489010]

|                                                             | Group 1 | Group 2 |
|-------------------------------------------------------------|---------|---------|
| Recruitment of possible participants (March)                | A       |         |
| Initial data collection (T <sub>0</sub> ) (March/April)     | B       |         |
| <i>Beginning of intervention</i>                            |         |         |
| Month 1 (April) (T <sub>1</sub> )                           | C       |         |
| Month 2 (May)                                               | D       |         |
| Month 3 (June)                                              | E       | E F G   |
| Month 4 (July)                                              | H       | H I J   |
| Month 5 (August) (T <sub>2</sub> )                          | L       | L M     |
| Final data collection (T <sub>3</sub> ) (September/October) | N       |         |

Group 1: *Lecture*; Group 2: *Lecture + Home Visit*

A: *Selection of possible participants, meeting with community health agents and final selection of individuals who fulfilled the eligibility criteria*; B: *Initial contact with participants for clarification of the objectives of the study; initial collection of socio-demographic data, living habits, habitual food intake and biochemical variables*; C: *Nutritional education workshop 1; data collection of initial anthropometric variables and BP*; D: *Nutritional education workshop 2; determination of weight and BP*; E: *Nutritional education workshop 3; determination of weight and BP*; F: *Home visit 1*; G: *Home visit 2*; H: *Nutritional education workshop 4; determination of weight and BP*; I: *Home visit 3*; J: *Home visit 4*; L: *Nutritional education workshop 5; final determination of weight and BP*; M: *Home visit 5*; N: *Final data collection on habitual food intake and biochemical variables*.
